# Supplementary material for: Biocompatible GdIII-functionalized fluorescent gold nanoclusters for optical and magnetic resonance imaging
Source: Royal Society of Chemistry journal article supplement (doi:10.1039/c3nj00052d), 2013-01-01
Supplement: c3nj00052d.pdf [file c3nj00052d.pdf]

## Supporting Information

### Biocompatible Gd<sup>III</sup>-Functionalized Fluorescent Gold Nanoclusters for Optical and Magnetic Resonance Imaging

Guoying Sun,<sup>\*a</sup> Lei Zhou,<sup>a</sup> Yanlan Liu<sup>b</sup> and Zhenbo Zhao<sup>a\*</sup>

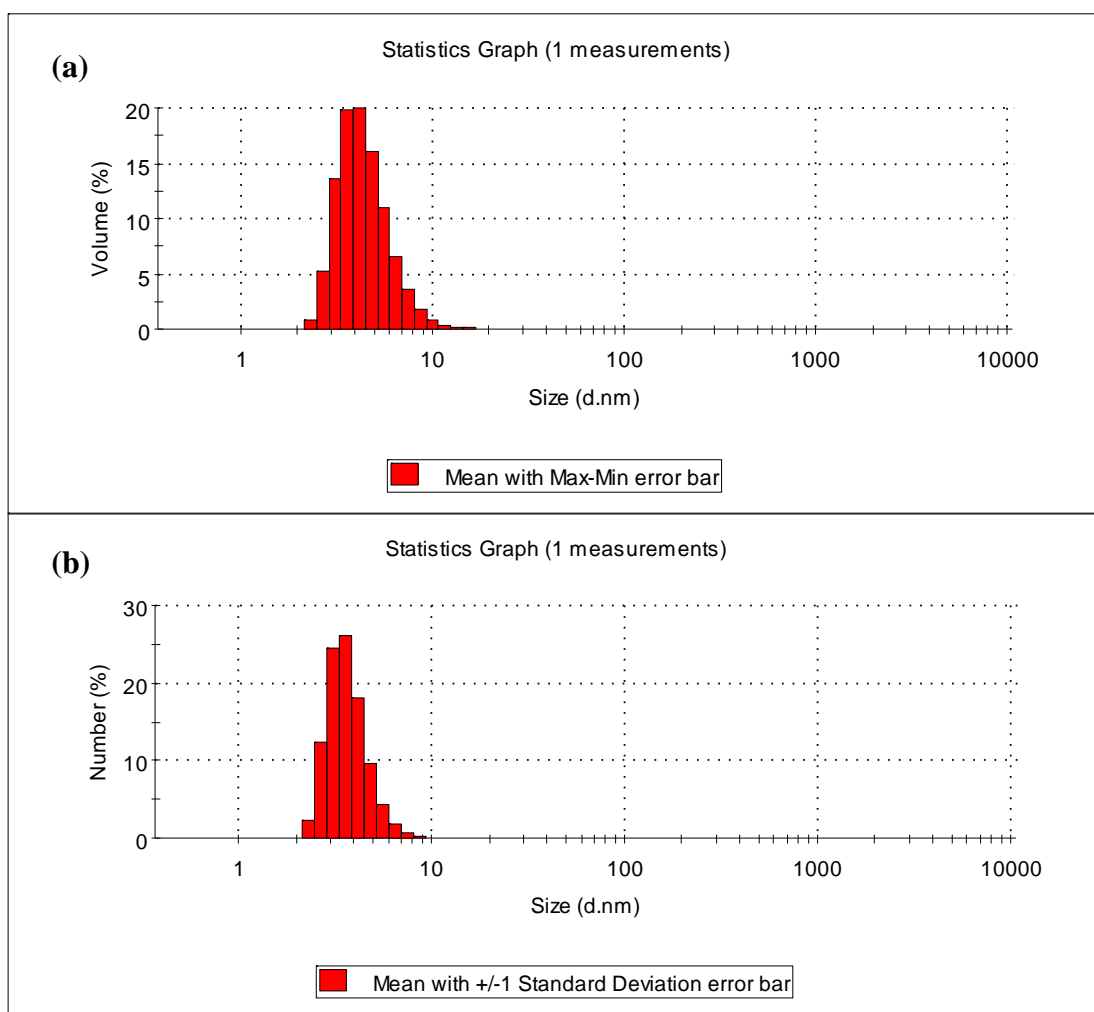

Figure S1. Hydrodynamic diameter distribution of (a) Au<sub>NC</sub>@BSA-(Gd-DTPA)<sub>n</sub> and (b) Au<sub>NC</sub>@BSA.

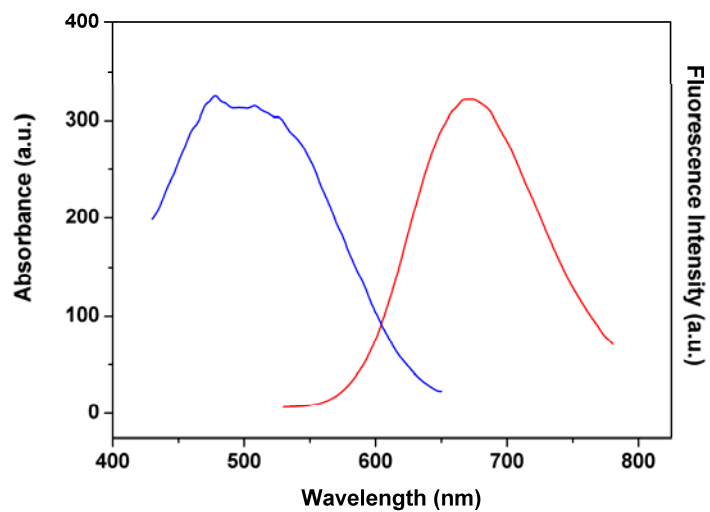

Figure S2. Optical absorption (blue) and photoemission (red,  $\lambda_{\text{ex}} = 470$  nm) spectra of  $\text{Au}_{\text{NC}}@$ BSA suspension.

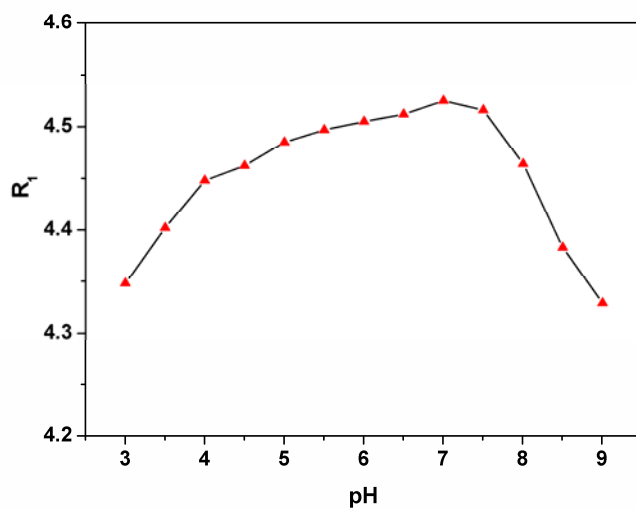

Figure S3. The  $R_1$  values of 0.1 mM  $\text{Au}_{\text{NC}}@$ BSA-(Gd-DTPA)<sub>n</sub> suspension as function of pH over the range 3~9.

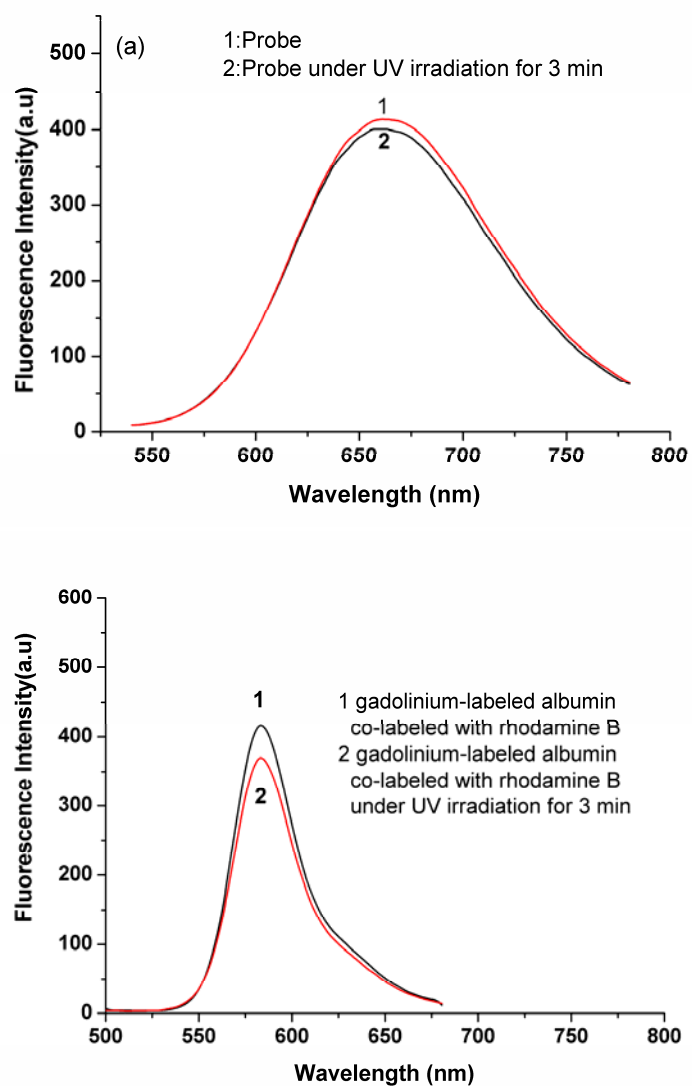

Figure S4. Fluorescence spectra of (a)  $\text{Au}_{\text{NC}}@BSA-(\text{Gd-DTPA})_n$  probe and (b) commercially-available gadolinium-labeled albumin co-labeled with rhodamine B before and after exposure to UV irradiation.

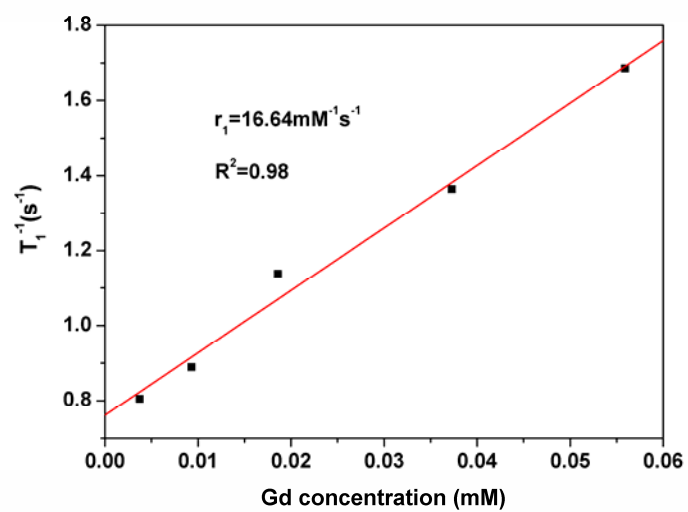

Figure S5. The linear relationship between T<sub>1</sub> relaxation rates (1/T<sub>1</sub>) and Gd<sup>3+</sup> concentrations for gadolinium-labeled albumin co-labeled with rhodamine B.
